# Supplementary material for: Using Data from Earth Observation to Support Sustainable Development Indicators: An Analysis of the Literature and Challenges for the Future
Source: MDPI journal article supplement (doi:10.3390/su14031191), 2022-01-21
Supplement: s1 [file s1]

**Table S1.** List of satellites and their characteristics (see below the link to the spreadsheet).

<https://docs.google.com/spreadsheets/d/1Xnv2rSx-Uk5EGmHOoWy8kZPGDs5qHI3pn4QEleFqzmz0/edit?usp=sharing>

**Table S2.** Free satellite imagery platform sources (\* Platform as a source for accessing the EO data)

| Platform* name                                                                                                                                | Provider                                                                                                                                        | Satellites/ Sensors/EO products                                                                                                                                                                                                                         | Data availability |
|-----------------------------------------------------------------------------------------------------------------------------------------------|-------------------------------------------------------------------------------------------------------------------------------------------------|---------------------------------------------------------------------------------------------------------------------------------------------------------------------------------------------------------------------------------------------------------|-------------------|
| USGS Earth Explorer<br><a href="http://earthexplorer.usgs.gov/">http://earthexplorer.usgs.gov/</a>                                            | NASA/USGS                                                                                                                                       | Landsat (all missions), Terra and Aqua MODIS, ASTER, VIIRS<br>Resourcesat-1 and 2; Sentinel-2 and some commercial VHR historical<br>satellite images IKONOS-2, OrbView-3, SPOT                                                                          | Globally          |
| USGS Global Visualisation Viewer<br>(GloVis)<br><a href="https://glovis.usgs.gov/">https://glovis.usgs.gov/</a>                               | NASA/USGS                                                                                                                                       | Digital Orthophoto Quadrangle (DOQ), EO-1 ALI, EO-1 Hyperion, Global<br>Land Survey, Resourcesat-1, Resourcesat-2, LISS-3, Landsat 1, 4, 7, 8,<br>OrbView-3, Sentinel-2, SRTM Void Filled                                                               | Globally          |
| NASA Earth Data<br><a href="https://earthdata.nasa.gov/earth-observation-data">https://earthdata.nasa.gov/earth-observation-data</a>          | NASA                                                                                                                                            | Terra and Aqua MODIS, ENVISAT, GOES, NOAA satellites, METEOSAT,<br>Suomi-NPP, Nimbus, CALIPSO, Landsat, and free GIS datasets that enable<br>the study of atmosphere, environment, ocean and sea, land cover,<br>vegetation, ice cover, and topography. | Globally          |
| ESA Landsat 8 Web Portal<br><a href="https://landsat8portal.eo.esa.int/portal/">https://landsat8portal.eo.esa.int/portal/</a>                 | NASA                                                                                                                                            | Landsat 8                                                                                                                                                                                                                                               | Mainly Europe     |
| ASTER GDEM<br><a href="https://ssl.jspacesystems.or.jp/ersdac/GDEM/E/index.html">https://ssl.jspacesystems.or.jp/ersdac/GDEM/E/index.html</a> | Ministry of<br>Economy, Trade<br>and Industry of<br>Japan (METI)<br>and the<br>National<br>Aeronautics and<br>Space<br>Administration<br>(NASA) | ASTER Global DEM (G-DEM) with 30 m DEM data                                                                                                                                                                                                             | Globally          |

|                                                                                                                                                                                                                                                                                                                                                     |                                              |                                                                                                                                                                                                         |                                             |
|-----------------------------------------------------------------------------------------------------------------------------------------------------------------------------------------------------------------------------------------------------------------------------------------------------------------------------------------------------|----------------------------------------------|---------------------------------------------------------------------------------------------------------------------------------------------------------------------------------------------------------|---------------------------------------------|
| USGS Earth Resources Observation and Science (EROS) Centre<br><a href="https://www.usgs.gov/centers/eros/science/usgs-eros-archive-products-overview?qt-science_center_objects=0#qt-science_center_objects">https://www.usgs.gov/centers/eros/science/usgs-eros-archive-products-overview?qt-science_center_objects=0#qt-science_center_objects</a> | NASA/USGS                                    | A large collection of EO data sources and products, e.g. AP collection; AVHRR; historical commercial satellites (SPOT, OrbView-3); DEM, Digital maps, EO-1, Landsat, Radar, Sentinel 2, UAS, MODIS, etc | Globally                                    |
| Copernicus Open Access Hub<br><a href="https://sentinel.esa.int/web/sentinel/">https://sentinel.esa.int/web/sentinel/</a>                                                                                                                                                                                                                           | ESA                                          | Sentinel-1, Sentinel-2, Sentinel-3, Sentinel-5P                                                                                                                                                         | Globally                                    |
| Sentinel Hub<br>EO Browser<br><a href="https://apps.sentinel-hub.com/eo-browser/">https://apps.sentinel-hub.com/eo-browser/</a><br>Sentinel Playground<br><a href="https://apps.sentinel-hub.com/sentinel-playground">https://apps.sentinel-hub.com/sentinel-playground</a>                                                                         | ESA                                          | EO Browser<br>Sentinel (all missions), Landsat 5-7, MODIS, ENVISAT Meris, Proba-V and GIBS products.                                                                                                    | Globally                                    |
|                                                                                                                                                                                                                                                                                                                                                     |                                              | Sentinel Playground<br>Sentinel-2, Landsat-8, MODIS and DEM.                                                                                                                                            | Globally                                    |
| NASA Worldview<br><a href="https://worldview.earthdata.nasa.gov/">https://worldview.earthdata.nasa.gov/</a>                                                                                                                                                                                                                                         | NASA                                         | MODIS, EOS LANCE, EOSDIS DAACs, NOAA.<br>Additional Layers to check air quality, dust storms, droughts, floods, vegetation, ash plumes, shipping, etc                                                   | Globally                                    |
| National Centers for Environmental Information<br><a href="https://www.ncdc.noaa.gov/data-access/quick-links">https://www.ncdc.noaa.gov/data-access/quick-links</a>                                                                                                                                                                                 | NOAA                                         | A wide range of climate and weather datasets, products, various web pages and resources.                                                                                                                | Globally                                    |
| EO Data Management System<br><a href="https://www.asc-csa.gc.ca/eng/satellites/radarsat/">https://www.asc-csa.gc.ca/eng/satellites/radarsat/</a>                                                                                                                                                                                                    | Canadian Space Agency                        | RADARSAT Constellation                                                                                                                                                                                  | Globally                                    |
| Catálogo de Imagens<br><a href="http://www.dgi.inpe.br/CDSR/">http://www.dgi.inpe.br/CDSR/</a>                                                                                                                                                                                                                                                      | National Institute for Space Research (INPE) | CBERS-2, CBERS-2b, CBERS-4, Terra and Aqua MODIS, ASTER, Landsat-8, ResourceSat, Suomi-NPP, DEIMOS, and UK DMC 2.                                                                                       | South and Central America, and Africa only. |

|                                                                                                                                                                                                                         |                                                                       |                                                                                                                                                                                          |                                                                          |
|-------------------------------------------------------------------------------------------------------------------------------------------------------------------------------------------------------------------------|-----------------------------------------------------------------------|------------------------------------------------------------------------------------------------------------------------------------------------------------------------------------------|--------------------------------------------------------------------------|
| Bhuvan<br><a href="https://bhuvan.nrsc.gov.in/bhuvan_links.php">https://bhuvan.nrsc.gov.in/bhuvan_links.php</a>                                                                                                         | Indian Space Research Organisation and national Remote Sensing centre | IMS, OceanSat, CartoSat, ResourceSat                                                                                                                                                     | Mainly India with several features applicable for global use (e.g. NDVI) |
| Global Precipitation measurements (GPM)<br><a href="https://gpm.nasa.gov/data/directory">https://gpm.nasa.gov/data/directory</a>                                                                                        | NASA                                                                  | Varied (near real-time gridded global multi-satellite precipitation)                                                                                                                     | Globally                                                                 |
| European Organisation for the exploitation of meteorological satellites (EUMETSAT)<br><br><a href="http://www.eumetsat.int/website/home/Data/DataDelivery/">http://www.eumetsat.int/website/home/Data/DataDelivery/</a> | EUMETSAT                                                              | Meteosat Series, Metop Series, Sentinel Series and Jason series                                                                                                                          | Varied depending on the satellite geostationary orbit                    |
| NOAA Comprehensive large array-data stewardship system (CLASS)<br><a href="https://www.avl.class.noaa.gov/saa/products/welcome">https://www.avl.class.noaa.gov/saa/products/welcome</a>                                 | NOAA                                                                  | Data availability is derived from POES and GOES , Global Navigation satellite system, Defence Meteorological Program, Radarsat. (real-time images of weather, oceans, fisheries, climate | Varied                                                                   |
| Earth on AWS<br><a href="https://aws.amazon.com/earth/?nc1=h_ls">https://aws.amazon.com/earth/?nc1=h_ls</a>                                                                                                             | Amazon                                                                | Landsat-8, Sentinel-2, and CBERS, GOES-16 and 17, and many others.                                                                                                                       | Globally                                                                 |
| Zoom Earth<br><a href="https://zoom.earth/">https://zoom.earth/</a>                                                                                                                                                     |                                                                       | GOES, JMA Himawari- 8, EUMETSAT Meteosat, GIBS, Terra and Aqua MODIS, SUOMI_SPP                                                                                                          | Globally                                                                 |
| MAXAR Open Data<br><a href="https://www.maxar.com/open-data/">https://www.maxar.com/open-data/</a>                                                                                                                      | MAXAR                                                                 | All MAXAR satellites available for the area in an event of disaster                                                                                                                      | Vary (only in the event of a disaster)                                   |
| ALOS 3D WORLD<br><a href="https://www.eorc.jaxa.jp/ALOS/aw3d30/l_map_v2003.htm">https://www.eorc.jaxa.jp/ALOS/aw3d30/l_map_v2003.htm</a>                                                                                | JAXA                                                                  | ALOS                                                                                                                                                                                     | Globally                                                                 |
| Esri ArcGIS Online<br><a href="https://www.esri.com/en-us/arcgis/products/arcgis-">https://www.esri.com/en-us/arcgis/products/arcgis-</a>                                                                               | ESRI                                                                  | A wide variety of raster and vector geospatial datasets datasets                                                                                                                         | Globally                                                                 |

|                                                                                                                                    |                       |                                                                                                                                                                                                                                                                                                                                                                                                                                                                              |                        |
|------------------------------------------------------------------------------------------------------------------------------------|-----------------------|------------------------------------------------------------------------------------------------------------------------------------------------------------------------------------------------------------------------------------------------------------------------------------------------------------------------------------------------------------------------------------------------------------------------------------------------------------------------------|------------------------|
| online/overview                                                                                                                    |                       |                                                                                                                                                                                                                                                                                                                                                                                                                                                                              |                        |
| Esri ArcGIS Online Image Services<br><a href="http://www.arcgis.com/home/gallery.html">http://www.arcgis.com/home/gallery.html</a> | ESRI                  | Providing multispectral, temporal, and event imagery, Basemaps                                                                                                                                                                                                                                                                                                                                                                                                               | Globally               |
| GIS Data Depot<br><a href="https://mdl.library.utoronto.ca/geospatial-data">https://mdl.library.utoronto.ca/geospatial-data</a>    | University of Toronto | A wide variety of raster and vector geospatial datasets                                                                                                                                                                                                                                                                                                                                                                                                                      | Vary                   |
| CEDA archive (part of NERC Environmental Data Service)<br><a href="http://archive.ceda.ac.uk/">http://archive.ceda.ac.uk/</a>      |                       | Responsible for atmospheric and EO datasets in 18 petabytes of data from climate models, satellites, aircraft, met observations, and other sources. <ul style="list-style-type: none"> <li>• Climate - e.g. HadUK Grid, CMIP, CRU</li> <li>• Composition - e.g. CCI</li> <li>• Observations - e.g. MIDAS Open</li> <li>• Numerical weather prediction - e.g. Met Office NWP</li> <li>• Airborne - e.g. FAAM</li> <li>• Satellite data and imagery - e.g. Sentinel</li> </ul> | Vary (mainly globally) |
| Alaska Satellite Facility<br><a href="https://asf.alaska.edu/">https://asf.alaska.edu/</a>                                         | Vary                  | Sentinel-1, ALOS Palsar, ALOS AVNIR-2, SIR-C, S1 InSAR, SMAP, UAVSAR, RADARSAT-1, ERS, JERS-1, AIRSAR, SEASAT                                                                                                                                                                                                                                                                                                                                                                | Globally               |

**Table S3.** Platforms for big EO data management

| EO Data Cube name                                                                             | Reference/ Source                                                                         |
|-----------------------------------------------------------------------------------------------|-------------------------------------------------------------------------------------------|
| Google Earth Engine (GEE)                                                                     | <a href="https://earthengine.google.com/">https://earthengine.google.com/</a>             |
| Earth on Amazon Web Services                                                                  | <a href="https://aws.amazon.com/earth/">https://aws.amazon.com/earth/</a>                 |
| Sentinel Hub (SH)                                                                             | <a href="https://www.sentinel-hub.com">https://www.sentinel-hub.com</a>                   |
| Open Data Cube (ODC)                                                                          | <a href="https://www.opendatacube.org">https://www.opendatacube.org</a>                   |
| Digital Earth Australia                                                                       | <a href="https://www.ga.gov.au/dea">https://www.ga.gov.au/dea</a>                         |
| CEOS Data Cube                                                                                | <a href="https://www.opendatacube.org/ceos">https://www.opendatacube.org/ceos</a>         |
| System for Earth Observation Data Access, Processing and Analysis for Land Monitoring (SEPAL) | <a href="https://github.com/openforis/sepal/">https://github.com/openforis/sepal/</a>     |
| JEODPP                                                                                        | <a href="https://jeodpp.jrc.ec.europa.eu/bdap/">https://jeodpp.jrc.ec.europa.eu/bdap/</a> |

|                                                                       |                                                                                                   |
|-----------------------------------------------------------------------|---------------------------------------------------------------------------------------------------|
| pipsCloud                                                             | <a href="https://eprints.soton.ac.uk/400354/">https://eprints.soton.ac.uk/400354/</a>             |
| NASA Earth Exchange                                                   | <a href="https://www.nasa.gov/nex">https://www.nasa.gov/nex</a>                                   |
| Azure Microsoft                                                       | <a href="https://azure.microsoft.com/en-gb/">https://azure.microsoft.com/en-gb/</a>               |
| Earth System Data Lab                                                 | <a href="https://www.earthsystemdatalab.net/">https://www.earthsystemdatalab.net/</a>             |
| Euro Data Cube                                                        | <a href="https://eurodatacube.com">https://eurodatacube.com</a>                                   |
| European Centre for Medium Range Weather Forecasts Climate Data Store | <a href="https://cds.climate.copernicus.eu/#!/home">https://cds.climate.copernicus.eu/#!/home</a> |
| Brazil Data Cube                                                      | <a href="http://brazildatacube.org">http://brazildatacube.org</a>                                 |

**Table S4.** EO thematic products

| Portal/ Product Name                                         | Source                                                                                                                                                                                                                                                                                                                                     | Main application                                                                   | SDG indicator                | Description                                                                | Temporal coverage | Region |
|--------------------------------------------------------------|--------------------------------------------------------------------------------------------------------------------------------------------------------------------------------------------------------------------------------------------------------------------------------------------------------------------------------------------|------------------------------------------------------------------------------------|------------------------------|----------------------------------------------------------------------------|-------------------|--------|
| ESA CCI Land Cover                                           | <a href="https://climate.esa.int/en/odp/#/dashboard">https://climate.esa.int/en/odp/#/dashboard</a>                                                                                                                                                                                                                                        | Climate change<br>Land Degradation<br>Sustainable Forest Management                | 15.3.1, 6.4.1                | Products of Land cover                                                     | 1992-2015         | Global |
| Global Forest Watch Tree cover                               | <a href="https://www.globalforestwatch.org/">https://www.globalforestwatch.org/</a>                                                                                                                                                                                                                                                        | Climate change<br>Land Degradation<br>Sustainable Forest Management                | 15.1.1, 15.2.1               | Provides access to tree cover gain and loss                                | 2001-present      | Global |
| Global Forest Watch Fire                                     | <a href="https://www.globalforestwatch.org/">https://www.globalforestwatch.org/</a>                                                                                                                                                                                                                                                        | Climate change<br>Land Degradation<br>Sustainable Forest Management<br>Air Quality | 1.5.1, 1.5.2, 11.5.1, 11.5.2 | Provides access to active fire                                             | Present           | Global |
| NASA Fire Information for Resource Management System (FIRMS) | <a href="https://earthdata.nasa.gov/earth-observation-data/near-real-time/firms">https://earthdata.nasa.gov/earth-observation-data/near-real-time/firms</a><br><a href="https://firms.modaps.eosdis.nasa.gov/map/#d:2021-03-19..2021-03-20;@0.0,0.0,3z">https://firms.modaps.eosdis.nasa.gov/map/#d:2021-03-19..2021-03-20;@0.0,0.0,3z</a> | Climate change<br>Land Degradation<br>Sustainable Forest Management                | 1.5.1, 1.5.2, 11.5.1, 11.5.2 | Active fire data within 3 hours of satellite overpass from MODIS and VIIRS | Present           | Global |

|                                                            |                                                                                                                                                                                         |                                                                     |                                                                   |                                                                                                                                |           |                        |
|------------------------------------------------------------|-----------------------------------------------------------------------------------------------------------------------------------------------------------------------------------------|---------------------------------------------------------------------|-------------------------------------------------------------------|--------------------------------------------------------------------------------------------------------------------------------|-----------|------------------------|
| European Forest Fire Information System                    | <a href="http://effis.jrc.ec.europa.eu">http://effis.jrc.ec.europa.eu</a>                                                                                                               | Climate change<br>Land Degradation<br>Sustainable Forest Management | 1.5.1, 1.5.2,<br>11.5.1, 11.5.2                                   | It supports the services in charge of the protection of forests against fires in the EU and neighbour countries.               | Present   | Varied (mainly Europe) |
| European Center for Medium-Range Weather Forecasts (ECMWF) | <a href="https://www.ecmwf.int/">https://www.ecmwf.int/</a>                                                                                                                             | Climate change                                                      | 11.6.2                                                            | Gridded Climate Datasets                                                                                                       | varied    | Global                 |
| NOAA Physical Sciences Laboratory (PSD)                    | <a href="https://psl.noaa.gov/data/gridded/">https://psl.noaa.gov/data/gridded/</a>                                                                                                     | Climate change                                                      | SDG 13<br>SDG 1                                                   | Gridded Climate Datasets                                                                                                       | varied    | Global                 |
| IPCC                                                       | <a href="http://www.ipcc-data.org/">http://www.ipcc-data.org/</a>                                                                                                                       | Climate change                                                      | SDG 13<br>SDG 1                                                   | Climate Change Scenarios                                                                                                       | 1961-2099 | Global                 |
| University of Maryland Global Forest Change                | <a href="http://earthenginepartners.appspot.com/science-2013-global-forest/download_v1.5.html">http://earthenginepartners.appspot.com/science-2013-global-forest/download_v1.5.html</a> | Climate change<br>Land Degradation<br>Sustainable Forest Management | 15.1.1                                                            | Global forest extent and change                                                                                                | 2000-2019 | Global                 |
| Gridded Population of the World (GPW)                      | <a href="https://sedac.ciesin.columbia.edu/data/collection/gpw-v4">https://sedac.ciesin.columbia.edu/data/collection/gpw-v4</a>                                                         | Varied, mainly useful for socio-economic applications               | This product can be used to many of the socio-economic indicators | Spatially disaggregated population layer that is compatible with datasets from social, economic, and Earth science disciplines | 1995-2015 | Global                 |
| Trends.Earth                                               | <a href="http://trends.earth/docs/en/">http://trends.earth/docs/en/</a>                                                                                                                 | Land Degradation                                                    | SDG 15.3.1                                                        | Customised platform for monitoring and reporting on SDG 15.3.1 (land degradation)                                              | varied    | Global                 |
| Protected Planet                                           | <a href="https://www.protectedplanet.net/en">https://www.protectedplanet.net/en</a>                                                                                                     | Biodiversity                                                        | 15.4.1                                                            | Provides access to the World Database on Protected Areas                                                                       | present   | Global                 |

|                                                                                                                 |                                                                                                                                                                                                  |                               |                            |                                                                                                                                                                                                                                                                                                                            |              |        |
|-----------------------------------------------------------------------------------------------------------------|--------------------------------------------------------------------------------------------------------------------------------------------------------------------------------------------------|-------------------------------|----------------------------|----------------------------------------------------------------------------------------------------------------------------------------------------------------------------------------------------------------------------------------------------------------------------------------------------------------------------|--------------|--------|
|                                                                                                                 |                                                                                                                                                                                                  |                               |                            | (WDPA)<br>IUCN Green List of Protected and Conserved Areas                                                                                                                                                                                                                                                                 |              |        |
| JRC Global Water & Surface Water Viewer                                                                         | <a href="https://global-surface-water.appspot.com/map">https://global-surface-water.appspot.com/map</a><br><a href="https://www.sdg661.app/">https://www.sdg661.app/</a>                         | Water                         | SDG 6.6.1                  | Location and temporal distribution of water surfaces at the global scale over the past 3.6 decades and provides statistics on the extent and change of those water surfaces                                                                                                                                                | 1984-2019    | Global |
| Global Human settlements (GHS), DLR Global Urban Footprint & ESA's Urban Thematic Exploitation Platform (U-TEP) | <a href="https://urban-tep.eu/#!">https://urban-tep.eu/#!</a><br><a href="https://urban-tep.eu/puma/tool/?id=574795484&amp;lang=en">https://urban-tep.eu/puma/tool/?id=574795484&amp;lang=en</a> | Land Degradation Urbanisation | SDG 11.3.1, 11.7.1, 1.5.2. | U-TEP multi-source data and tools, all available in a single platform, aims to provide comprehensive information to help scientists, planners and decision-makers in creating and maintaining sustainable urban environments (in major cities but also in smaller, rural areas), as well as documenting changes over time. | varied       | Global |
| FAO Water productivity (WaPOR)                                                                                  | <a href="https://wapor.apps.fao.org/home/WAPOR_2/1">https://wapor.apps.fao.org/home/WAPOR_2/1</a>                                                                                                | Land Degradation Water        | 6.4.1                      | African continent above ground biomass,                                                                                                                                                                                                                                                                                    | 2009-present | Africa |

|                                         |                                                                                                                                                                                          |                                            |                               |                                                                                                                                                                        |                       |          |
|-----------------------------------------|------------------------------------------------------------------------------------------------------------------------------------------------------------------------------------------|--------------------------------------------|-------------------------------|------------------------------------------------------------------------------------------------------------------------------------------------------------------------|-----------------------|----------|
|                                         |                                                                                                                                                                                          |                                            |                               | evapotranspiration, etc.                                                                                                                                               |                       |          |
| Coral Reef Watch                        | <a href="https://coralreefwatch.noaa.gov/satellite/index.php">https://coralreefwatch.noaa.gov/satellite/index.php</a>                                                                    | Water Biodiversity                         | 14.3.1                        | SST, SST Anomaly, Coral Bleaching Hotspot, etc.                                                                                                                        | 2014-present          | Regional |
| Allen Coral Atlas                       | <a href="https://allencoralatlas.org/">https://allencoralatlas.org/</a>                                                                                                                  | Biodiversity                               | 14.3.1                        | World coral reefs                                                                                                                                                      | present               | Regional |
| Global Mangrove Watch                   | <a href="https://data.unep-wcmc.org/datasets/45">https://data.unep-wcmc.org/datasets/45</a><br><a href="https://www.globalmangrovetwatch.org/">https://www.globalmangrovetwatch.org/</a> | Biodiversity Sustainable Forest Management | 6.6.1, 15.1.1, 15.1.2, 13.1   | Mangrove extent, gain, and loss                                                                                                                                        | 1996 - 2015, and 2016 | Regional |
| Digital Observatory for Protected Areas | <a href="https://dopa-explorer.jrc.ec.europa.eu/">https://dopa-explorer.jrc.ec.europa.eu/</a>                                                                                            | Biodiversity                               | 15.4.1                        | JRC database of protected areas                                                                                                                                        | Present               | Regional |
| UN Biodiversity Lab                     | <a href="https://www.unbiodiversitylab.org/">https://www.unbiodiversitylab.org/</a>                                                                                                      | Biodiversity                               | 15.1.1, 15.1.2, 6.6.1, 14.4.1 | Information on the Aichi Biodiversity Targets and nature-based SDGs                                                                                                    | Present               | Regional |
| Coastal Thematic Exploitation Platform  | <a href="https://www.coastal-tep.eu/">https://www.coastal-tep.eu/</a>                                                                                                                    | Maritime management                        | 6.3.1, 14.1.1                 | The platform provides advanced tools and data management resources to easily process and manage large volumes of coastal data.                                         | Over 20 years         | Regional |
| Forestry Thematic Exploitation Platform | <a href="https://f-tep.com">https://f-tep.com</a>                                                                                                                                        | Sustainable Forest Management              | 15.1.1, 15.2.1                | It is online solution for commercial, research and public sector users to provide expanding databases of EO and auxiliary datasets and the benefits of powerful online | Varied                | Global   |

|                                           |                                                                     |                                                |                                  |                                                                                                                                                                                                                      |        |               |
|-------------------------------------------|---------------------------------------------------------------------|------------------------------------------------|----------------------------------|----------------------------------------------------------------------------------------------------------------------------------------------------------------------------------------------------------------------|--------|---------------|
|                                           |                                                                     |                                                |                                  | processing approaches in your forest monitoring activities.                                                                                                                                                          |        |               |
| Hydrology Thematic Exploitation Platform  | <a href="https://hydrology-tep.eu">https://hydrology-tep.eu</a>     | Hydrology<br>Flood monitoring<br>Water quality | 6.1.1, 6.4.1                     | It provides the tool to perform water and flood frequency maps, water level time series of small lakes and rivers, generate water masks, monitor key water quality parameters, gain insights into ecological status. | Varied | Global        |
| Geohazards Thematic Exploitation Platform | <a href="https://geohazards-tep.eu">https://geohazards-tep.eu</a>   | Geohazards                                     | 13.1.1                           | The platform is meant for users to easily exploit EO data resources (optical and radar), by combining fast data access, Cloud processing facilities and intuitive data analysis tools.                               | Varied | Global        |
| Polar Thematic Exploitation Platform      | <a href="https://portal.polartep.io">https://portal.polartep.io</a> | Climate change                                 | SDG 13, targets 13.2, 13.3, 13.a | It provides polar researchers with access to computing resources, EO and other data, and software tools in the cloud. This new approach will remove the need to transfer                                             | Varied | Polar regions |

|                                                              |                                                                                                                                                                                                                               |                                    |                             |                                                                                                                                                                                                           |        |               |
|--------------------------------------------------------------|-------------------------------------------------------------------------------------------------------------------------------------------------------------------------------------------------------------------------------|------------------------------------|-----------------------------|-----------------------------------------------------------------------------------------------------------------------------------------------------------------------------------------------------------|--------|---------------|
|                                                              |                                                                                                                                                                                                                               |                                    |                             | large EO data sets                                                                                                                                                                                        |        |               |
| Food Security Thematic Exploitation Platform                 | <a href="https://foodsecurity-tep.net">https://foodsecurity-tep.net</a>                                                                                                                                                       | Food security                      | 2.3.1, 2.4.1, 6.4.1, 15.3.1 | The platform is meant for users to easily exploit EO data resources, by combining fast data access, Cloud processing facilities and intuitive data analysis tools.                                        | Varied | Polar regions |
| FAO Open Foris                                               | <a href="http://www.openforis.org/">http://www.openforis.org/</a>                                                                                                                                                             | Land Degradation                   | 15.1.1,15.2.1,15.4.1        | Land assessment through mobile and online tools.                                                                                                                                                          | Varied | Global        |
| The Global Soil Organic Carbon map (GSOCMap)                 | <a href="http://www.fao.org/soils-portal/data-hub/soil-maps-and-databases/global-soil-organic-carbon-map-gsocmap">http://www.fao.org/soils-portal/data-hub/soil-maps-and-databases/global-soil-organic-carbon-map-gsocmap</a> | Land Degradation<br>Climate Change | 15.3.1                      | identify degraded areas, set restoration targets, explore SOC sequestration potentials and support the greenhouse gas emission reporting required by the UNFCCC                                           | Varied | Global        |
| Global Ecosystem Dynamics Investigation (GEDI) (using LIDAR) | <a href="https://gedi.umd.edu/">https://gedi.umd.edu/</a>                                                                                                                                                                     | Land Degradation                   | 15.2,2.3                    | It provides answers to how deforestation has contributed to atmospheric CO <sub>2</sub> concentrations, how much carbon forests will absorb in the future, and how habitat degradation will affect global | Varied | Global        |

|                      |                                                                                 |                  |                          |                                                                                                                          |              |          |
|----------------------|---------------------------------------------------------------------------------|------------------|--------------------------|--------------------------------------------------------------------------------------------------------------------------|--------------|----------|
|                      |                                                                                 |                  |                          | biodiversity.                                                                                                            |              |          |
| TerraBrasilis portal | <a href="http://terrabrasilis.dpi.inpe.br">http://terrabrasilis.dpi.inpe.br</a> | Land Degradation | 15.1.1,15.2.,15.4.1, 2.3 | EO thematic products aiming to monitor deforestation and forest fires since 1988 for the entire Brazilian Amazon region. | 1988-present | Regional |
| Queimadas portal     | <a href="https://queimadas.dgi.inpe.br">https://queimadas.dgi.inpe.br</a>       | Land Degradation | 15.1.1,15.2.,15.4.1, 2.3 | EO thematic products aiming to monitor deforestation and forest fires since 1988 for the entire Brazilian Amazon region. | 1988-present | Regional |

| 1. NO POVERTY                                            |         |         |         |         |         |                                      |         |         |         | 2. ZERO HUNGER                           |        |        |        |                      |        |                                                 |        |        |        |                          |        |        |        |         |         |
|----------------------------------------------------------|---------|---------|---------|---------|---------|--------------------------------------|---------|---------|---------|------------------------------------------|--------|--------|--------|----------------------|--------|-------------------------------------------------|--------|--------|--------|--------------------------|--------|--------|--------|---------|---------|
| 1.1                                                      | 1.2     | 1.3     | 1.4     | 1.5     |         |                                      | 1a      | 1b      | 2.1     | 2.2                                      | 2.3    | 2.4    | 2.5    | 2a                   | 2b     | 2c                                              |        |        |        |                          |        |        |        |         |         |
| 1.1.1                                                    | 1.2.2   | 1.2.2   | 1.3.1   | 1.4.1   | 1.4.2   | 1.5.1                                | 1.5.2   | 1.5.3   | 1.5.4   | 1a.1                                     | 1a.2   | 1b.1   | 2.1.1  | 2.1.2                | 2.2.1  | 2.2.2                                           | 2.3.1  | 2.3.2  | 2.4.1  | 2.5.1                    | 2.5.2  | 2a.1   | 2a.2   | 2b.1    | 2c.1    |
| 3. GOOD HEALTH AND WELL-BEING                            |         |         |         |         |         |                                      |         |         |         |                                          |        |        |        |                      |        |                                                 |        |        |        |                          |        |        |        |         |         |
| 3.1                                                      |         |         | 3.2     |         | 3.3     |                                      |         | 3.4     |         | 3.5                                      |        | 3.6    | 3.7    |                      | 3.8    |                                                 | 3.9    |        | 3a.1   | 3b                       | 3c     |        | 3d     |         |         |
| 3.1.1                                                    | 3.1.2   | 3.2.1   | 3.2.2   | 3.3.1   | 3.3.2   | 3.3.3                                | 3.3.4   | 3.3.5   | 3.4.1   | 3.4.2                                    | 3.5.1  | 3.5.2  | 3.6.1  | 3.7.1                | 3.7.2  | 3.8.1                                           | 3.8.2  | 3.9.1  | 3.9.2  | 3.9.3                    | 3a.1   | 3b.1   | 3b.2   | 3c.1    | 3d.1    |
| 4. QUALITY EDUCATION                                     |         |         |         |         |         |                                      |         |         |         | 5. GENDER EQUALITY                       |        |        |        |                      |        |                                                 |        |        |        |                          |        |        |        |         |         |
| 4.1                                                      |         | 4.2     | 4.3     | 4.4     | 4.5     | 4.6                                  | 4.7     | 4a      | 4b      | 4c                                       | 5.1    | 5.2    |        | 5.3                  |        | 5.4                                             | 5.5    |        | 5.6    |                          | 5a     |        | 5b     | 5c      |         |
| 4.1.1                                                    | 4.2.1   | 4.2.2   | 4.3.1   | 4.4.1   | 4.5.1   | 4.6.1                                | 4.7.1   | 4a.1    | 4b.1    | 4c.1                                     | 5.1.1  | 5.2.1  | 5.2.2  | 5.3.1                | 5.3.2  | 5.4.1                                           | 5.5.1  | 5.5.2  | 5.6.1  | 5.6.2                    | 5a.1   | 5a.2   | 5b.1   | 5c.1    |         |
| 6. CLEAN WATER & SANITATION                              |         |         |         |         |         |                                      |         |         |         | 7. AFFORDABLE & CLEAN ENERGY             |        |        |        |                      |        | 8. DECENT WORK & ECONOMIC GROWTH                |        |        |        |                          |        |        |        |         |         |
| 6.1                                                      | 6.2     | 6.3     |         | 6.4     |         | 6.5                                  |         | 6.6     | 6a      | 6b                                       | 7.1    |        | 7.2    | 7.3                  | 7a     | 7b                                              | 8.1    | 8.2    | 8.3    | 8.4                      |        | 8.5    |        | 8.6     | 8.7     |
| 6.1.1                                                    | 6.2.1   | 6.3.1   | 6.3.2   | 6.4.1   | 6.4.2   | 6.5.1                                | 6.5.2   | 6.6.1   | 6a.1    | 6b.1                                     | 7.1.1  | 7.1.2  | 7.2.1  | 7.3.1                | 7a.1   | 7b.1                                            | 8.1.1  | 8.2.1  | 8.3.1  | 8.4.1                    | 8.4.2  | 8.5.1  | 8.5.2  | 8.6.1   | 8.7.1   |
| 8. DECENT WORK & ECONOMIC GROWTH (contd.)                |         |         |         |         |         |                                      |         |         |         | 9. INDUSTRY, INNOVATION & INFRASTRUCTURE |        |        |        |                      |        |                                                 |        |        |        | 10. REDUCED INEQUALITIES |        |        |        |         |         |
| 8.8                                                      |         | 8.9     |         | 8.10    |         | 8a                                   | 8b      | 9.1     |         | 9.2                                      |        | 9.3    | 9.4    |                      | 9.5    |                                                 | 9a     | 9b     | 9c     | 10.1                     | 10.2   | 10.3   | 10.4   | 10.5    | 10.6    |
| 8.8.1                                                    | 8.8.2   | 8.9.1   | 8.9.2   | 8.10.1  | 8.10.2  | 8a.1                                 | 8b.1    | 9.1.1   | 9.1.2   | 9.2.1                                    | 9.2.2  | 9.3.1  | 9.3.2  | 9.4.1                | 9.5.1  | 9.5.2                                           | 9a.1   | 9b.1   | 9c.1   | 10.1.1                   | 10.2.1 | 10.3.1 | 10.4.1 | 10.5.1  | 10.6.1  |
| 10. REDUCED INEQUALITIES (contd.)                        |         |         |         |         |         | 11. SUSTAINABLE CITIES & COMMUNITIES |         |         |         |                                          |        |        |        |                      |        | 12. RESPONSIBLE CONSUMPTION & PROD <sup>n</sup> |        |        |        |                          |        |        |        |         |         |
| 10.7                                                     |         | 10a     | 10b     | 10c     | 11.1    | 11.2                                 | 11.3    |         | 11.4    | 11.5                                     |        | 11.6   |        | 11.7                 |        | 11a                                             | 11b    |        | 11c    | 12.1                     | 12.2   |        | 12.3   | 12.4    |         |
| 10.7.1                                                   | 10.7.2  | 10a.1   | 10b.1   | 10c.1   | 11.1.1  | 11.2.1                               | 11.3.1  | 11.3.2  | 11.4.1  | 11.5.1                                   | 11.5.2 | 11.6.1 | 11.6.2 | 11.7.1               | 11.7.2 | 11a.1                                           | 11b.1  | 11b.2  | 11c.1  | 12.1.1                   | 12.2.1 | 12.2.2 | 12.3.1 | 12.4.1  | 12.4.2  |
| 12. RESPONSIBLE CONSUMPTION & PROD <sup>n</sup> (contd.) |         |         |         |         |         |                                      |         |         |         | 13. CLIMATE ACTION                       |        |        |        |                      |        | 14. LIFE BELOW WATER                            |        |        |        |                          |        |        |        |         |         |
| 12.5                                                     | 12.6    | 12.7    | 12.8    | 12a     | 12b     | 12c                                  | 13.1    |         | 13.2    | 13.3                                     |        | 13a    | 13b    | 14.1                 | 14.2   | 14.3                                            | 14.4   | 14.5   | 14.6   | 14.7                     | 14a    | 14b    | 14c    |         |         |
| 12.5.1                                                   | 12.6.1  | 12.7.1  | 12.8.1  | 12a.1   | 12b.1   | 12c.1                                | 13.1.1  | 13.1.2  | 13.2.1  | 13.3.1                                   | 13.3.2 | 13a.1  | 13b.1  | 14.1.1<br>(a)<br>(b) | 14.2.1 | 14.3.1                                          | 14.4.1 | 14.5.1 | 14.6.1 | 14.7.1                   | 14a.1  | 14b.1  | 14c.1  |         |         |
| 15. LIFE ON LAND                                         |         |         |         |         |         |                                      |         |         |         | 16. PEACE, JUSTICE & STRONG INSTITUTIONS |        |        |        |                      |        |                                                 |        |        |        |                          |        |        |        |         |         |
| 15.1                                                     |         | 15.2    | 15.3    | 15.4    |         | 15.5                                 | 15.6    | 15.7    | 15.8    | 15.9                                     | 15a    | 15b    | 15c    | 16.1                 |        |                                                 | 16.2   |        |        | 16.3                     |        |        | 16.4   |         |         |
| 15.1.1                                                   | 15.1.2  | 15.2.1  | 15.3.1  | 15.4.1  | 15.4.2  | 15.5.1                               | 15.6.1  | 15.7.1  | 15.8.1  | 15.9.1                                   | 15a.1  | 15b.1  | 15c.1  | 16.1.1               | 16.1.2 | 16.1.3                                          | 16.1.4 | 16.2.1 | 16.2.2 | 16.2.3                   | 16.3.1 | 16.3.2 | 16.4.1 | 16.4.2  |         |
| 16. PEACE, JUSTICE & STRONG INSTITUTIONS (contd.)        |         |         |         |         |         |                                      |         |         |         | 17. PARTNERSHIPS FOR THE GOALS           |        |        |        |                      |        |                                                 |        |        |        |                          |        |        |        |         |         |
| 16.5                                                     |         | 16.6    |         | 16.7    |         | 16.8                                 | 16.9    | 16.10   |         | 16a                                      | 16b    | 17.1   | 17.2   | 17.3                 |        | 17.4                                            | 17.5   | 17.6   |        | 17.7                     | 17.8   | 17.9   | 17.10  | 17.11   |         |
| 16.5.1                                                   | 16.5.2  | 16.6.1  | 16.6.2  | 16.7.1  | 16.7.2  | 16.8.1                               | 16.9.1  | 16.10.1 | 16.10.2 | 16a.1                                    | 16b.1  | 17.1.1 | 17.1.2 | 17.2.1               | 17.3.1 | 17.3.2                                          | 17.4.1 | 17.5.1 | 17.6.1 | 17.6.2                   | 17.7.1 | 17.8.1 | 17.9.1 | 17.10.1 | 17.11.1 |
| 17. PARTNERSHIPS FOR THE GOALS (contd.)                  |         |         |         |         |         |                                      |         |         |         |                                          |        |        |        |                      |        |                                                 |        |        |        |                          |        |        |        |         |         |
| 17.12                                                    | 17.13   | 17.14   | 17.15   | 17.16   | 17.17   | 17.18                                |         | 17.19   |         |                                          |        |        |        |                      |        |                                                 |        |        |        |                          |        |        |        |         |         |
| 17.12.1                                                  | 17.13.1 | 17.14.1 | 17.15.1 | 17.16.1 | 17.17.1 | 17.18.1                              | 17.18.2 | 17.18.3 | 17.19.1 | 17.19.2                                  |        |        |        |                      |        |                                                 |        |        |        |                          |        |        |        |         |         |

**EO satellite data contribution to support SDG Indicators**

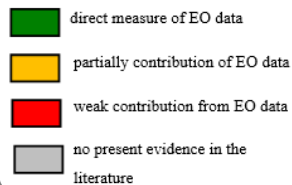

Figure S1. MMF 2.0 Dashboard (version 2019).
